# Supplementary material for: Sarcopenia-related traits and coronary artery disease: a bi-directional Mendelian randomization study
Source: Aging (Albany NY). 2020 Feb 16;12(4):3340–53. doi: 10.18632/aging.102815 (PMC7066916; doi:10.18632/aging.102815)
Supplement: Supplementary Tables [file aging-12-102815-s004..pdf]

## SUPPLEMENTARY TABLES

Please browse Full Text version to see the data of Supplementary Tables 1, 2, 4

**Supplementary Table 1. Independent IVs of body lean mass (kg), handgrip strength (left, kg) and handgrip strength (right, kg) in stage 1 analysis.**

**Supplementary Table 2. Independent IVs of body lean mass (kg), handgrip strength (left, kg) and handgrip strength (right, kg) in stage 2 analysis.**

**Supplementary Table 3. MR-Egger analysis and variance explained by IVs in stage 2 analysis.**

| Exposure | outcome                    | egger_intercept | se        | p-value   | snp_r2.exposure | snp_r2.outcome | MR-Steiger test |
|----------|----------------------------|-----------------|-----------|-----------|-----------------|----------------|-----------------|
| CAD      | Body lean mass             | 0.003232        | 0.003535  | 0.3664673 | 0.0134791       | 0.0028114      | TRUE            |
| CAD      | Hand grip strength (left)  | -0.00016        | 0.0014287 | 0.9125408 | 0.0134791       | 0.0003529      | TRUE            |
| CAD      | Hand grip strength (right) | -0.00054        | 0.0013761 | 0.6950098 | 0.0134791       | 0.0003309      | TRUE            |

**Supplementary Table 4. Independent IVs of body lean mass (kg), handgrip strength (left, kg) and handgrip strength (right, kg) and coronary artery disease in negative control analysis.**

**Supplementary Table 5. Two-sample mendelian randomization analysis of negative control (myopia).**

| <b>Exposure</b>                   | <b>outcome</b> | <b>method</b>                                                | <b>n. IVs</b> | <b>P.value</b> | <b>beta (95% CI)</b>  |
|-----------------------------------|----------------|--------------------------------------------------------------|---------------|----------------|-----------------------|
| <b>CAD</b>                        | myopia         | MR Egger                                                     | 39            | 0.374          | -0.004 (-0.013,0.005) |
| <b>CAD</b>                        | myopia         | Weighted median                                              | 39            | 0.238          | -0.003(-0.007,0.002)  |
| <b>CAD</b>                        | myopia         | Inverse variance weighted                                    | 39            | 0.75           | 0.001(-0.003,0.004)   |
| <b>CAD</b>                        | myopia         | Inverse variance weighted<br>(multiplicative random effects) | 39            | 0.75           | 0.001(-0.003,0.004)   |
| <b>CAD</b>                        | myopia         | Inverse variance weighted (fixed effects)                    | 39            | 0.657          | 0.001(-0.002,0.003)   |
| <b>CAD</b>                        | myopia         | Robust adjusted profile score (RAPS)                         | 39            | 0.99           | 0(-0.004,0.004)       |
| <b>body lean mass</b>             | myopia         | MR Egger                                                     | 405           | 0.883          | -0.001(-0.018,0.015)  |
| <b>body lean mass</b>             | myopia         | Weighted median                                              | 405           | 0.02           | 0.009(0.001,0.017)    |
| <b>body lean mass</b>             | myopia         | Inverse variance weighted                                    | 405           | 0.17           | 0.005(-0.002,0.011)   |
| <b>body lean mass</b>             | myopia         | Inverse variance weighted<br>(multiplicative random effects) | 405           | 0.17           | 0.005(-0.002,0.011)   |
| <b>body lean mass</b>             | myopia         | Inverse variance weighted (fixed effects)                    | 405           | 0.065          | 0.005(0,0.01)         |
| <b>body lean mass</b>             | myopia         | Robust adjusted profile score (RAPS)                         | 405           | 0.099          | 0.006(-0.001,0.012)   |
| <b>Hand grip strength (left)</b>  | myopia         | MR Egger                                                     | 85            | 0.233          | 0.039(-0.024,0.102)   |
| <b>Hand grip strength (left)</b>  | myopia         | Weighted median                                              | 85            | 0.145          | 0.014(-0.005,0.032)   |
| <b>Hand grip strength (left)</b>  | myopia         | Inverse variance weighted                                    | 85            | 0.399          | 0.007(-0.009,0.022)   |
| <b>Hand grip strength (left)</b>  | myopia         | Inverse variance weighted<br>(multiplicative random effects) | 85            | 0.399          | 0.007(-0.009,0.022)   |
| <b>Hand grip strength (left)</b>  | myopia         | Inverse variance weighted (fixed effects)                    | 85            | 0.264          | 0.007(-0.005,0.019)   |
| <b>Hand grip strength (left)</b>  | myopia         | Robust adjusted profile score (RAPS)                         | 85            | 0.262          | 0.009(-0.007,0.024)   |
| <b>Hand grip strength (right)</b> | myopia         | MR Egger                                                     | 101           | 0.173          | 0.035(-0.015,0.085)   |
| <b>Hand grip strength (right)</b> | myopia         | Weighted median                                              | 101           | 0.176          | 0.011(-0.005,0.027)   |
| <b>Hand grip strength (right)</b> | myopia         | Inverse variance weighted                                    | 101           | 0.505          | 0.004(-0.009,0.018)   |
| <b>Hand grip strength (right)</b> | myopia         | Inverse variance weighted<br>(multiplicative random effects) | 101           | 0.505          | 0.004(-0.009,0.018)   |
| <b>Hand grip strength (right)</b> | myopia         | Inverse variance weighted (fixed effects)                    | 101           | 0.421          | 0.004(-0.006,0.015)   |
| <b>Hand grip strength (right)</b> | myopia         | Robust adjusted profile score (RAPS)                         | 101           | 0.457          | 0.005(-0.008,0.018)   |

CAD: coronary artery disease; IVs: instrumental variables.

**Supplementary Table 6. MR-Egger analysis and explained by selected IVs of negative control (myopia).**

| <b>Exposure</b>                   | <b>outcome</b> | <b>MR-Egger. intercept</b> | <b>se</b> | <b>p.val</b> | <b>r<sup>2</sup>.exposure</b> | <b>r<sup>2</sup>.outcome</b> |
|-----------------------------------|----------------|----------------------------|-----------|--------------|-------------------------------|------------------------------|
| <b>CAD</b>                        | myopia         | 0.0004999                  | 0.0004338 | 0.25656      | 0.0134791                     | 0.0002211                    |
| <b>lean mass</b>                  | myopia         | 0.0000988                  | 0.0001305 | 0.44943      | 0.0898249                     | 0.0022361                    |
| <b>Hand grip strength (left)</b>  | myopia         | -0.0004489                 | 0.0004375 | 0.307857     | 0.0119751                     | 0.0004522                    |
| <b>Hand grip strength (right)</b> | myopia         | -0.0004309                 | 0.0003468 | 0.216888     | 0.0142341                     | 0.0004624                    |

r<sup>2</sup> means phenotypes explained by selected IVs. CAD: coronary artery disease; IVs: instrumental variables.
